# Supplementary material
Source: PubMed Central journal article supplement (PMC4414246)
Supplement: NIHMS678082-supplement-SI.pdf [file NIHMS678082-supplement-SI.pdf]

# **Synthetic RNA Recognition Motifs that Selectively Recognize HIV-1 Trans-Activation Response Element Hairpin RNA**

Brett D. Blakeley<sup>†</sup> and Brian R. McNaughton<sup>\*,†,‡</sup>

<sup>†</sup>Department of Chemistry, <sup>‡</sup>Department of Biochemistry and Molecular Biology,  
Colorado State University  
Fort Collins, Colorado 80523, USA

E-mail: [brian.mcnaughton@colostate.edu](mailto:brian.mcnaughton@colostate.edu)

## Table of Contents

### Materials and Instrumentation

|                      |    |
|----------------------|----|
| Materials.....       | S3 |
| Instrumentation..... | S3 |

### Experimental Data

|                                                                                                                                                                 |     |
|-----------------------------------------------------------------------------------------------------------------------------------------------------------------|-----|
| Cloning, expression, and purification of U1A variants.....                                                                                                      | S4  |
| Table S1. Nucleic acids used in this work.....                                                                                                                  | S4  |
| Table S2. Primers used in this work.....                                                                                                                        | S5  |
| Figure S1. Fluorescence Polarization Raw Data for Table 1.....                                                                                                  | S6  |
| Figure S2. Fluorescence Polarization Raw Data for Table 2.....                                                                                                  | S7  |
| Figure S3. Fluorescence Polarization Raw Data for Table 3.....                                                                                                  | S9  |
| Figure S4. Fluorescence Polarization Raw Data for Table 4.....                                                                                                  | S10 |
| Table S3. Selected Variants of U1A Binding to TAR RNA in<br>the Presence or Absence of 10 Molar Equivalents of tRNA.....                                        | S12 |
| Figure S5. Fluorescence Polarization Raw Data for Table S3.....                                                                                                 | S13 |
| Figure S6. Combinations of Beneficial Mutations Were Incorporated Into<br>Either the U1A or $\Delta$ K $\Delta$ M Scaffold and Tested for TAR RNA Affinity..... | S13 |

### Purity of Select Proteins Used in this Work

|                                                               |     |
|---------------------------------------------------------------|-----|
| Figure S7. Selected Variants of U1A Featured in Table S3..... | S14 |
|---------------------------------------------------------------|-----|

## Materials and Instrumentation

### Materials

LB Miller's Broth – Fisher  
5-alpha chemically competent E.coli – New England Biolabs  
BL21(DE3) Competent E.coli – New England Biolabs  
Bacteriological agar - Fisher  
Carbenicillin Disodium Salt – GoldBio Technology  
L(+) arabinose – GoldBio Technology  
Kanamycin – GoldBio Technology  
IPTG, dioxane free – GoldBio Technology  
Innova 42/42R incubator shakers – New Brunswick Scientific  
Molecular imager gel doc XR+ system – Biorad  
Q5 DNA Polymerase – New England Biolabs  
15% Ready Gel precast gels - Biorad  
Black 384-well polystyrene plates (Corning)

All water was obtained from a Milli-Q water purification system.

### Instrumentation

Sonifier W-350 cell disruptor  
J2-21 centrifuges – Beckman  
Perkin-Elmer Victor V multimode microplate reader  
MJ mini gradient thermal cycler – Biorad

## Experimental Data

### Cloning, expression, and purification of U1A variants

Plasmids containing U1A and U1A  $\Delta$ K50  $\Delta$ M51 were generously provided by Professor Laird-Offringa (University of Southern California). Point mutations were introduced by site directed mutagenesis using standard molecular biology techniques. A general protocol is as follows: To generate the U1A E19S mutation, dNTPs, the template pET3d plasmid containing wtU1A, the forward primer FP E19S (5'-CCT CAA TTC GAA GAT CAA GAA GGA TGA GCT CAA AAA GTC CC-3'), the reverse primer RP E19S (5'-CCT TCT TGA TCT TCG AAT TGA GGT TGT TGA TAT AAA TAG TGT GG-3'), and Pfu Turbo DNA polymerase were mixed in the appropriate reaction buffer. PCR was carried out using the following cycle: 94°C for 30 seconds, 58°C for 2 minutes, 64°C for 8 minutes, repeat 15 times and finally 64°C for ten minutes. At the conclusion of the PCR, 20 units of DpnI (New England Biolabs) was added to the reaction followed by incubation at 37°C for 1 hour. Amplification of the mutated plasmid was verified by running 20  $\mu$ L of the reaction on a 1% agarose gel with ethidium bromide and then 1  $\mu$ L of the reaction was transformed into 5- $\alpha$  chemically competent *E.coli* (New England Biolabs) according to the manufacturers instructions. All other mutations were prepared in a similar manner using the appropriate primers from the table below. In some cases where two codons in close proximity were mutated, a double mutant primer was designed to incorporate both mutants. Mutants were expressed and purified as previously described.<sup>S1</sup>

**Table S1. Nucleic acids used in this work**

| Nucleic Acid | Sequence                             |
|--------------|--------------------------------------|
| TAR RNA      | 5'-GGCAGAUUCUGAGCCUGGGAGCUCUCUGCC-3' |
| U1hpII RNA   | 5'-AGCTTATCCATTGCACCGGATAAGCT-3'     |
| ESS-3 RNA    | 5'-GGAUCCAUUCGAUUAGUGAACGGAUCC-3'    |
| TAR DNA      | 5'-GGCAGATCTGAGCCTGGGAGCTCTCTGCC-3'  |
| ESS-3 DNA    | 5'-GGATCCATTCGATTAGTGAACGGATCC-3'    |

**Table S2. Primers used in this work**

| Primer Name           | Sequence                                                          |
|-----------------------|-------------------------------------------------------------------|
| FP U1A N15A           | 5'-CCTAACCACACTATTATATCGCCAACCTCAATGAGAAGATCAAG-3'                |
| RP U1A N15A           | 5'-CTTGATCTTCTCATTGAGGTTGGCGATATAAATAGTGTGGTTAGG-3'               |
| FP U1A N16A           | 5'-CCTAACCACACTATTATATCAACGCCCTCAATGAGAAGATCAAGAAGG-3'            |
| RP U1A N16A           | 5'-CCTTCTTGATCTTCTCATTGAGGGCGTTGATATAAATAGTGTGGTTAGG-3'           |
| FP U1A E19A           | 5'-CCACACTATTATATCAACAACCTCAATGCGAAGATCAAGAAGGATGAGCTC-3'         |
| RP U1A E19A           | 5'-GAGCTCATCCTTCTTGATCTTCGCATTGAGGTTGTTGATATAAATAGTGTGG-3'        |
| FP U1A S46A           | 5'-GATATCCTGGTAGCACGGAGCCTGAAG-3'                                 |
| RP U1A S46A           | 5'-CTCCGTGCTACCAGGATATCCAGGATC-3'                                 |
| FP U1A S48A           | 5'-ACGGGCCCTGAAGATGAGGGGCC-3'                                     |
| RP U1A S48A           | 5'-CATCTTCAGGGCCGTGATACCAGGATATCCAGG-3'                           |
| FPU1A L49A            | 5'-GAGCGCGAAGATGAGGGGCCAAG-3'                                     |
| RP U1A L49A           | 5'-CCTCATCTTCGCGCTCCGTGATACCAGG-3'                                |
| FP U1A K50A           | 5'-GCCTGGCGATGAGGGGCC-3'                                          |
| RP U1A K50A           | 5'-CCTCATCGCCAGGCTCCGTGATACC-3'                                   |
| FP U1A M51A           | 5'-AGCCTGAAGGCGAGGGGCC-3'                                         |
| RP U1A M51A           | 5'-CCTCGCCTTCAGGCTCCGTGATACCAG-3'                                 |
| FP ΔKΔM S46A          | 5'-GATATCCTGGTAGCACGGAGCCTGAGG-3'                                 |
| RP ΔKΔM S46A          | 5'-CTCCGTGCTACCAGGATATCCAGGATC-3'                                 |
| FP ΔKΔM S48A          | 5'-GGTATCACGGGCCCTGAGGGGCC-3'                                     |
| RP ΔKΔM S48A          | 5'-CTCAGGGCCCGTATACCAGGATATCCAGG-3'                               |
| FP ΔKΔM L49A          | 5'-CGGAGCGCGAGGGGCC-3'                                            |
| RP ΔKΔM L49A          | 5'-CCTCGCGCTCCGTGATACCAGG-3'                                      |
| FP U1A E19S           | 5'-CCTCAATTGGAAGATCAAGAAGGATGAGCTCAAAAAGTCCC-3'                   |
| RP U1A E19S           | 5'-CCTTCTTGATCTTCAATTGAGGTTGTTGATATAAATAGTGTGG-3'                 |
| FP U1A E19F           | 5'-CCTCAATTTCAAGATCAAGAAGGATGAGCTCAAAAAGTCCC-3'                   |
| RP U1A E19F           | 5'-CCTTCTTGATCTTCAAATTGAGGTTGTTGATATAAATAGTGTGG-3'                |
| FP U1A E19K           | 5'-CCTCAATAAGAAGATCAAGAAGGATGAGCTCAAAAAGTCCC-3'                   |
| RP U1A E19K           | 5'-CCTTCTTGATCTTCTTATTGAGGTTGTTGATATAAATAGTGTGG-3'                |
| FP U1A E19Q           | 5'-CCTCAATCAGAAGATCAAGAAGGATGAGCTCAAAAAGTCCC-3'                   |
| RP U1A E19Q           | 5'-CCTTCTTGATCTTCTGATTGAGGTTGTTGATATAAATAGTGTGG-3'                |
| FP U1A L49E           | 5'-GAGCGAGAAGATGAGGGGCCAAG-3'                                     |
| RP U1A L49E           | 5'-CCTCATCTTCGCTCCGTGATACCAGG-3'                                  |
| FP U1A L49F           | 5'-GAGCTTCAAGATGAGGGGCCAAG-3'                                     |
| RP U1A L49F           | 5'-CCTCATCTTGAAGCTCCGTGATACCAGG-3'                                |
| FP U1A L49K           | 5'-GAGCAAGAAGATGAGGGGCCAAG-3'                                     |
| RP U1A L49K           | 5'-CCTCATCTTCTTGCTCCGTGATACCAGG-3'                                |
| FP U1A L49N           | 5'-GAGCAACAAGATGAGGGGCCAAG-3'                                     |
| RP U1A L49N           | 5'-CCTCATCTTGTGCTCCGTGATACCAGG-3'                                 |
| FP U1A L49S           | 5'-GAGCAGCAAGATGAGGGGCCAAG-3'                                     |
| RP U1A L49S           | 5'-CCTCATCTTGTGCTCCGTGATACCAGG-3'                                 |
| FP U1A M51E           | 5'-AGCCTGAAGGAGAGGGGCC-3'                                         |
| RP U1A M51E           | 5'-CCTCTCCTTCAGGCTCCGTGATACCAG-3'                                 |
| FP U1A M51F           | 5'-AGCCTGAAGTTCAAGGGGCC-3'                                        |
| RP U1A M51F           | 5'-CCTGAACCTTCAGGCTCCGTGATACCAG-3'                                |
| FP U1A M51K           | 5'-AGCCTGAAGAAGAGGGGCC-3'                                         |
| RP U1A M51K           | 5'-CCTCTTCTTCAGGCTCCGTGATACCAG-3'                                 |
| FP U1A M51N           | 5'-AGCCTGAAGAACAGGGGCC-3'                                         |
| RP U1A M51N           | 5'-CCTGTTCTTCAGGCTCCGTGATACCAG-3'                                 |
| FP U1A M51S           | 5'-AGCCTGAAGAGCAGGGGCC-3'                                         |
| RP U1A M51S           | 5'-CCTGCTCTTCAGGCTCCGTGATACCAG-3'                                 |
| FP U1A Y13Q           | 5'-CGCTCCTAACCCACACTATTGGTATCAACAACCTCAATGAGAAGATC-3'             |
| RP U1A Y13Q           | 5'-GGTTGTTGATCTGAATAGTGTGGTTAGGACGCGTCTCGG-3'                     |
| FP U1A F56A           | 5'-CGGAGCCTGAGGGGCCAAGCCGCGTATCTTCAAGGAGG-3'                      |
| RP U1A F56A           | 5'-CCTCCTTGAAGATGACCGCGCTTGGCCCTCAGGCTCCG-3'                      |
| FP U1A N15V           | 5'-CCACACTATTATATCGTCAACCTCAATGAGAAGATCAAGAAGGATGAGCTCAAAAAGTC-3' |
| RP U1A N15V           | 5'-GAGGTTGACGATATAAATAGTGTGGTTAGGACGCGTCTCGGG-3'                  |
| FP U1A L49A M51A      | 5'-GAGCGCGAAGGCGAGGGGCCAAGCTTTTGTG-3'                             |
| RP U1A L49A M51A      | 5'-CCCTCGCCTTCGCGCTCCGTGATACCAGG-3'                               |
| FP U1A S48A L49A      | 5'-ACGGGCCGCGAAGATGAGGGGCCAAGC-3'                                 |
| RP U1A S48A L49A      | 5'-CATCTTCGCGGCCGTGATACCAGGATATCCAGG-3'                           |
| FP U1A S48A M51A      | 5'-ACGGGCCCTGAAGGCGAGGGGCCAAGCTTTTGTG-3'                          |
| RP U1A S48A M51A      | 5'-CCCTCGCCTTCAGGGCCCGTATACCAGG-3'                                |
| FP U1A S48A L49A M51A | 5'-ACGGGCCGCGAAGGCGAGGGGCCAAGCTTTTGTG-3'                          |
| RP U1A S48A L49A M51A | 5'-CCCTCGCCTTCGCGGCCCGTATACCAGGATATCCAGG-3'                       |
| FP U1A N15A N16A      | 5'-CTATTTATATCGCCCTCAATGAGAAGATCAAGAAGGATGAGCTCAAAAAGTCC-3'       |
| RP U1A N15A N16A      | 5'-GAGGGCGCGATATAAATAGTGTGGTTAGGACGCGTCTCGGG-3'                   |
| FP U1A N15A E19A      | 5'-GCCAACCTCAATGCGAAGATCAAGAAGGATGAGCTCAAAAAGTCCC-3'              |
| RP U1A N15A E19A      | 5'-CGCATTGAGGTTGGCGATATAAATAGTGTGGTTAGGACGCGTCTCGG-3'             |
| FP U1A N16A E19A      | 5'-ACGCCCTCAATGCGAAGATCAAGAAGGATGAGCTCAAAAAGTCCC-3'               |
| RP U1A N16A E19A      | 5'-CGCATTGAGGGCGTTGATATAAATAGTGTGGTTAGGACGCGTCTCG-3'              |
| FP U1A Y13Q E19S      | 5'-CCACACTATTAGATCAACAACCTCAATTGGAAGATCAAGAAGGATGAGC-3'           |
| RP U1A Y13Q E19A      | 5'-CCACACTATTAGATCAACAACCTCAATGCGAAGATCAAGAAGGATGAGC-3'           |
| FP U1A Y13Q E19F      | 5'-CCACACTATTAGATCAACAACCTCAATTTCAAGATCAAGAAGGATGAGC-3'           |
| RP U1A N15V E19S      | 5'-CCACACTATTATATCGTCAACCTCAATTCGAAGATCAAGAAGGATGAGCTCAAAAAGTC-3' |
| FP U1A N15V E19A      | 5'-CCACACTATTATATCGTCAACCTCAATGCGAAGATCAAGAAGGATGAGCTCAAAAAGTC-3' |
| RP U1A N15V E19F      | 5'-CCACACTATTATATCGTCAACCTCAATTTCAAGATCAAGAAGGATGAGCTCAAAAAGTC-3' |

**Figure S1. Fluorescence Polarization Data for Table 1. Binding affinities for complexes involving TAR RNA and U1A or  $\Delta K51\Delta M51$ , and specific alanine mutants thereof.**

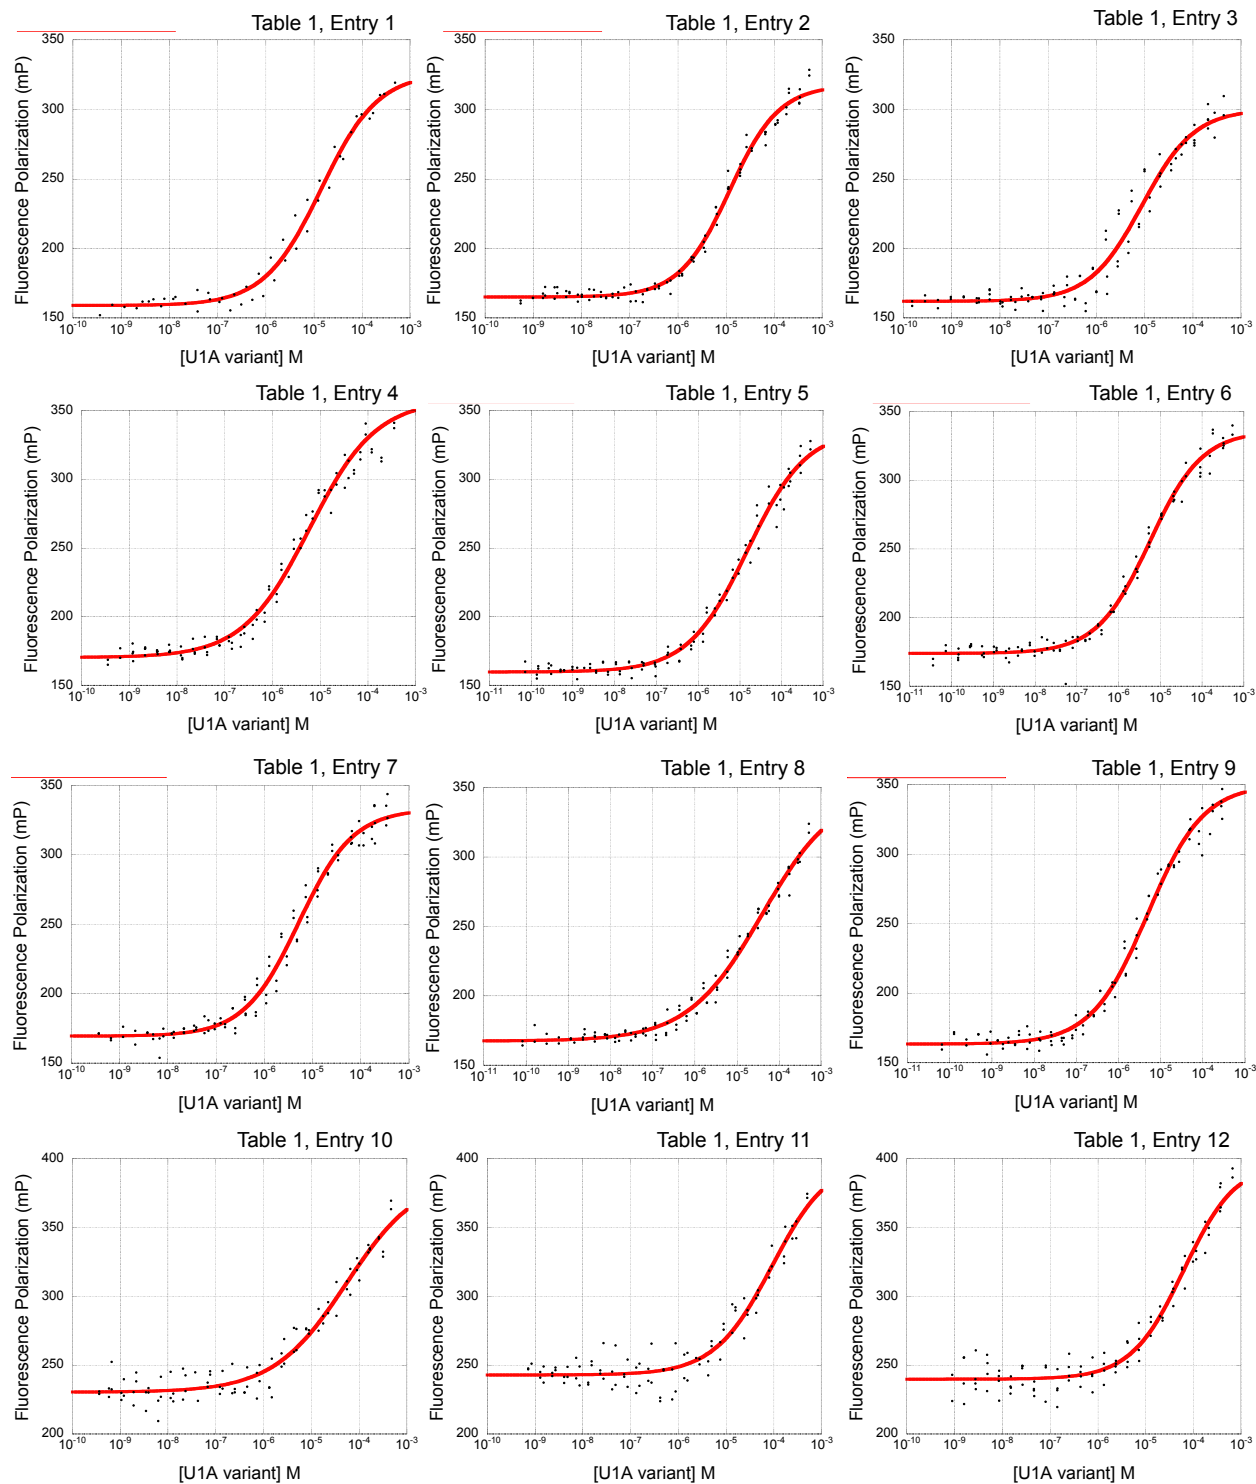

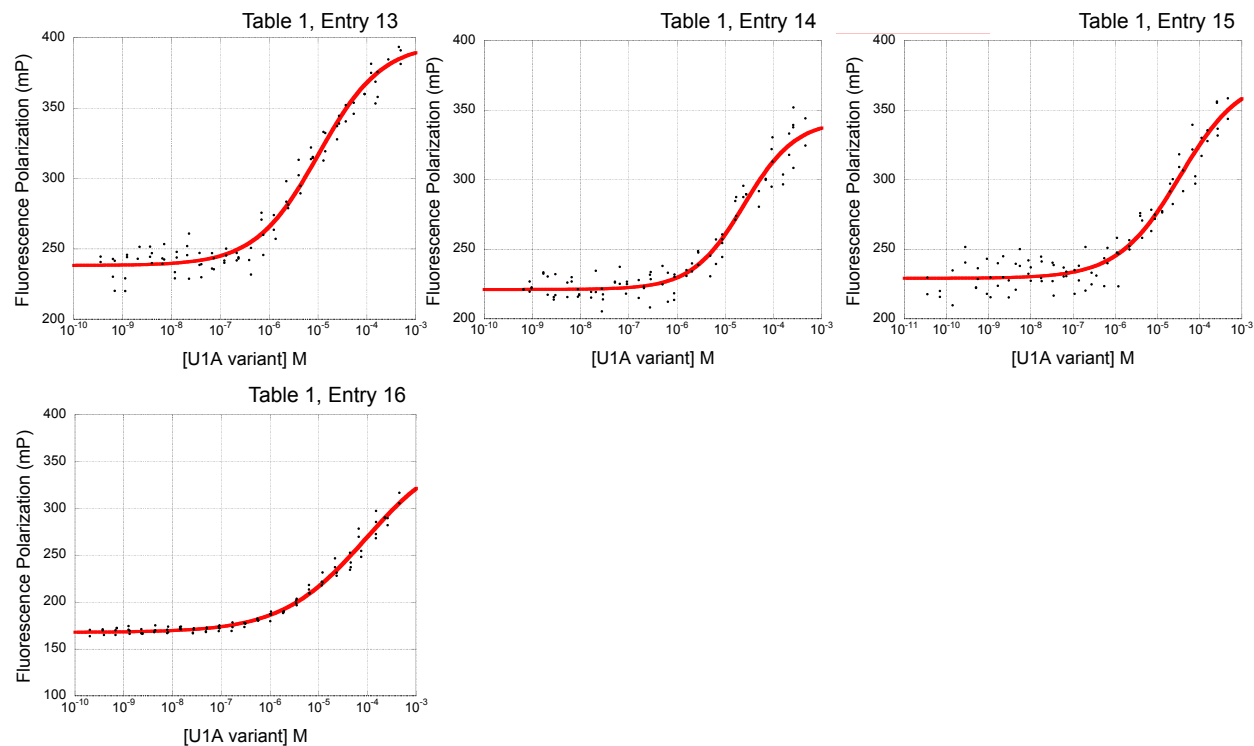

**Figure S2. Fluorescence Polarization Raw Data for Table 2. Binding affinities for complexes involving TAR RNA and specific U1A- and  $\Delta K50\Delta M51$ -derived mutants.**

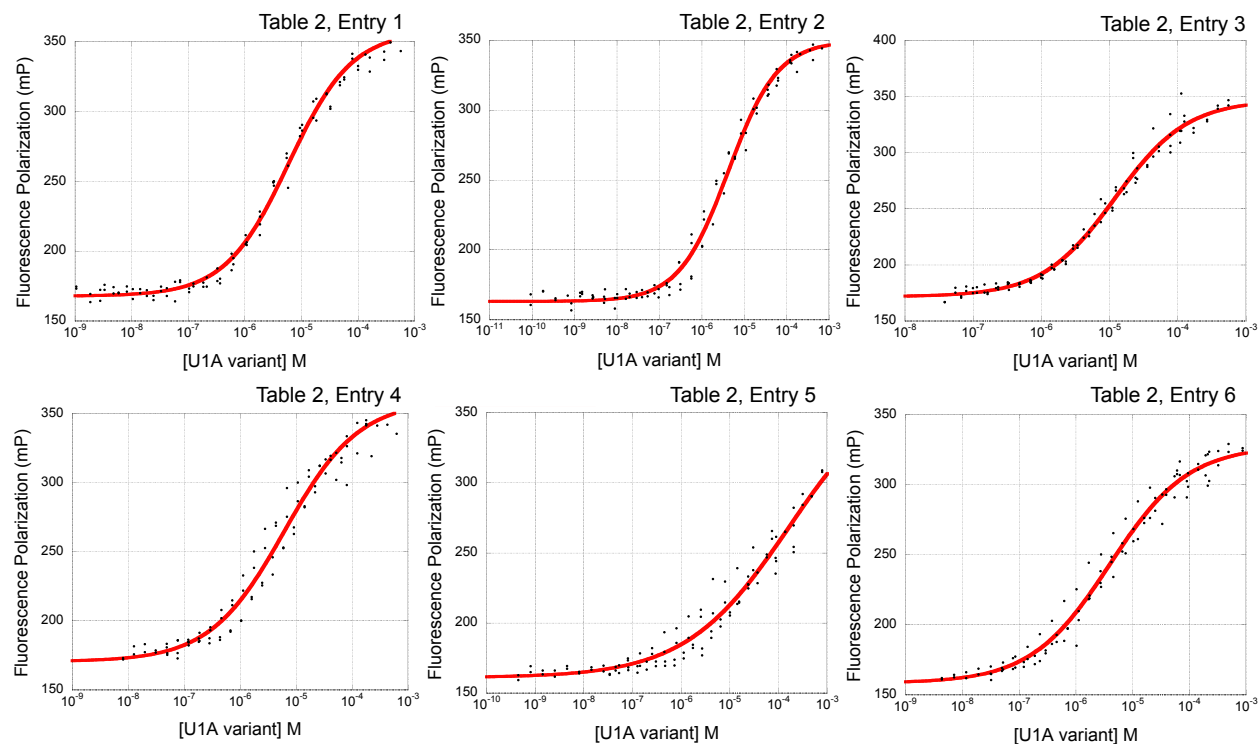

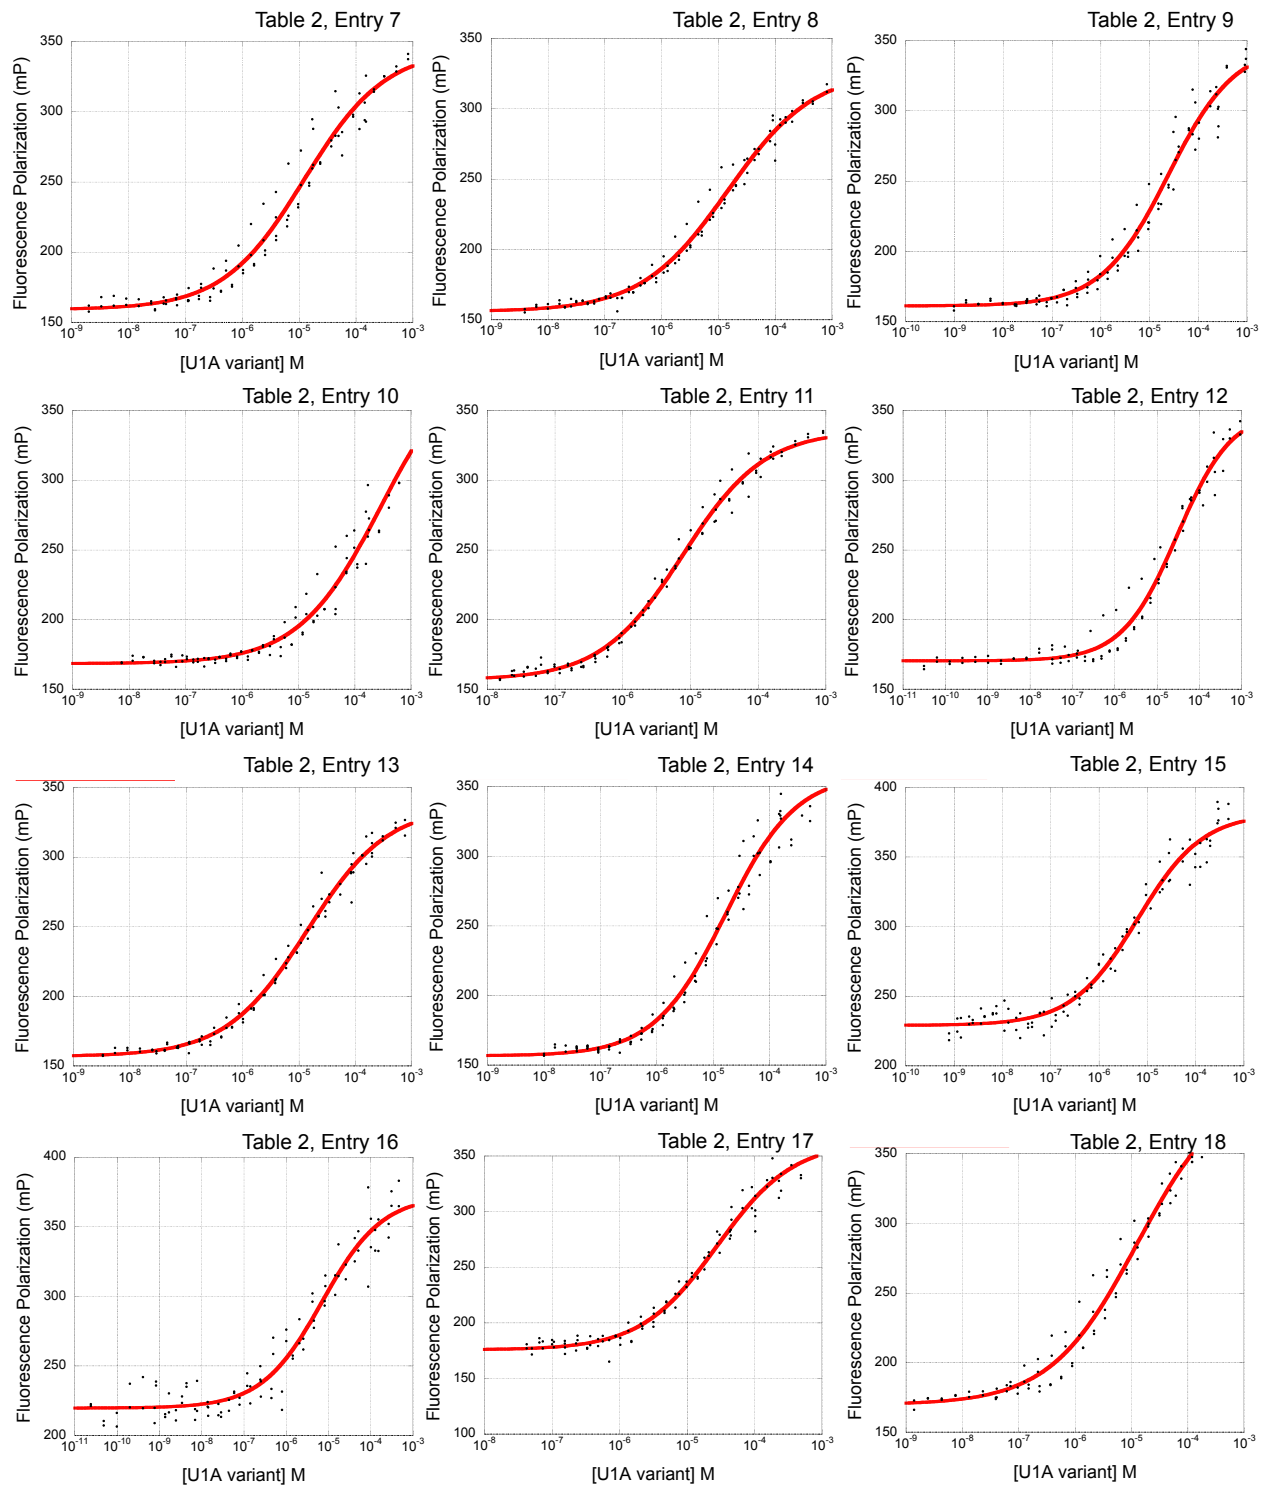



**Figure S3. Fluorescence Polarization Raw Data for Table 3. Binding selectivity of specific U1A- and  $\Delta K50\Delta M51$ -derived mutants for TAR RNA over TAR DNA or U1hpII RNA.**

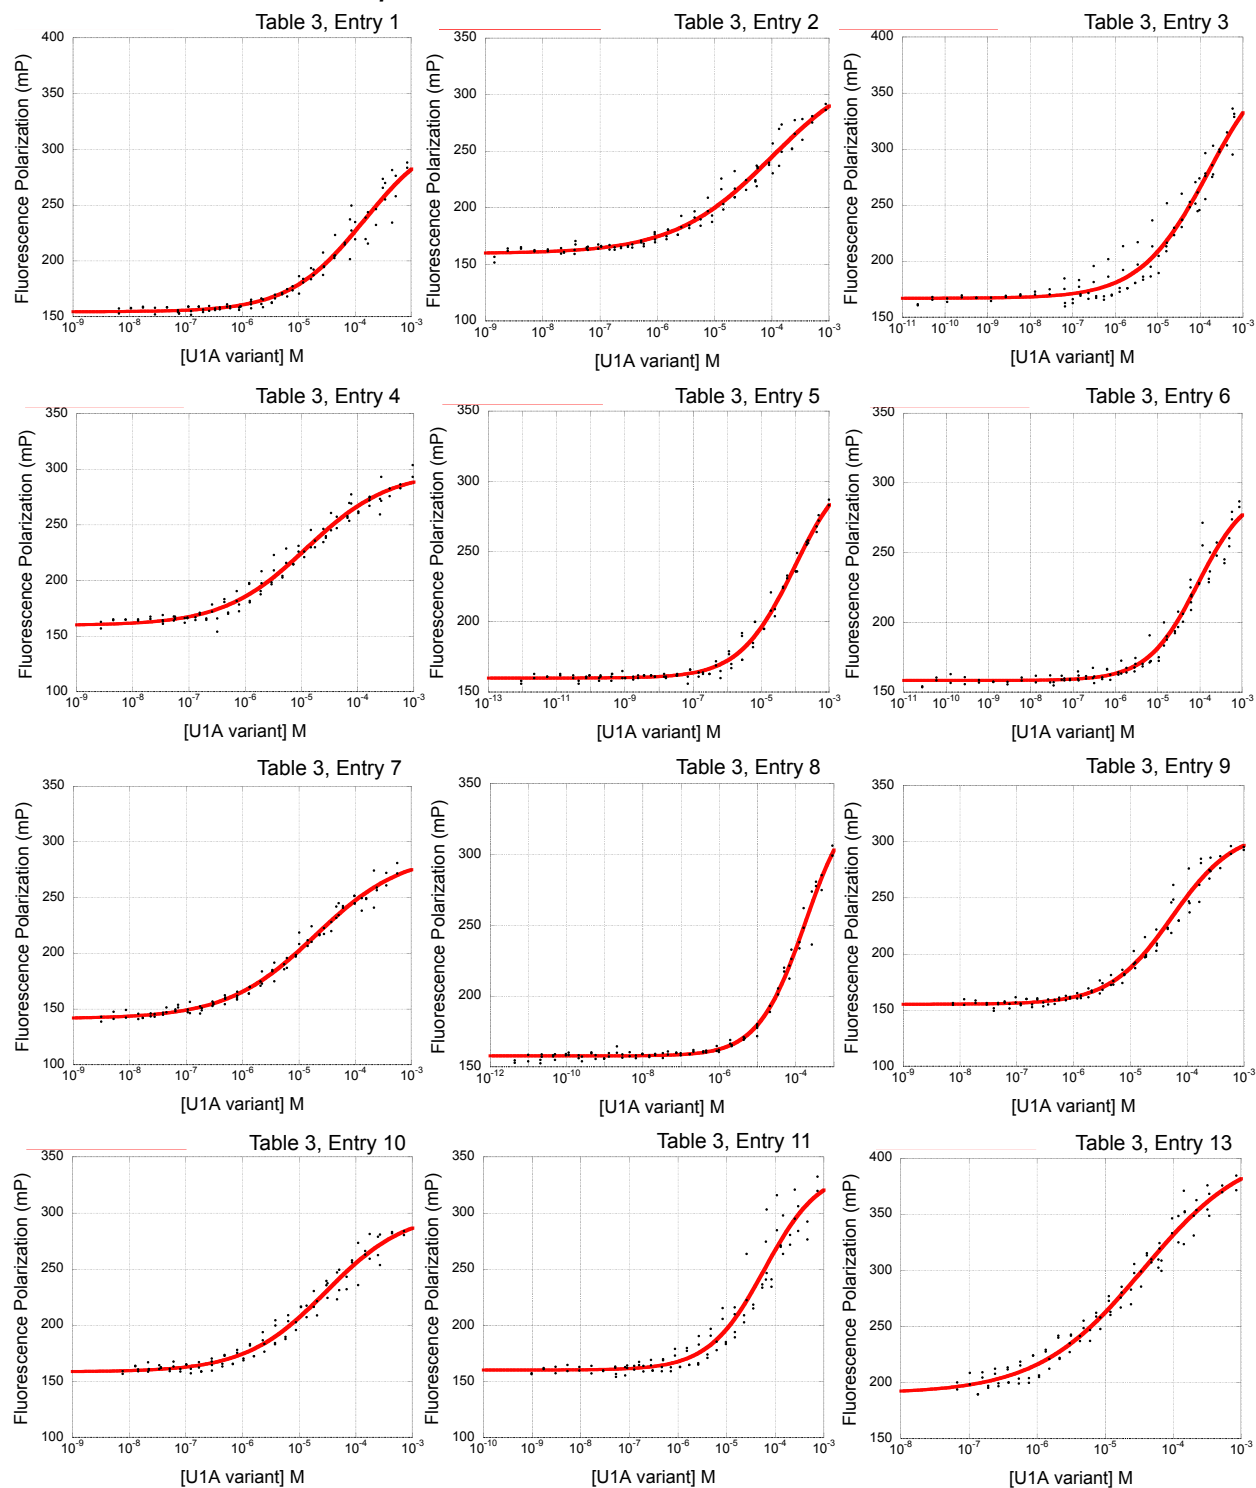

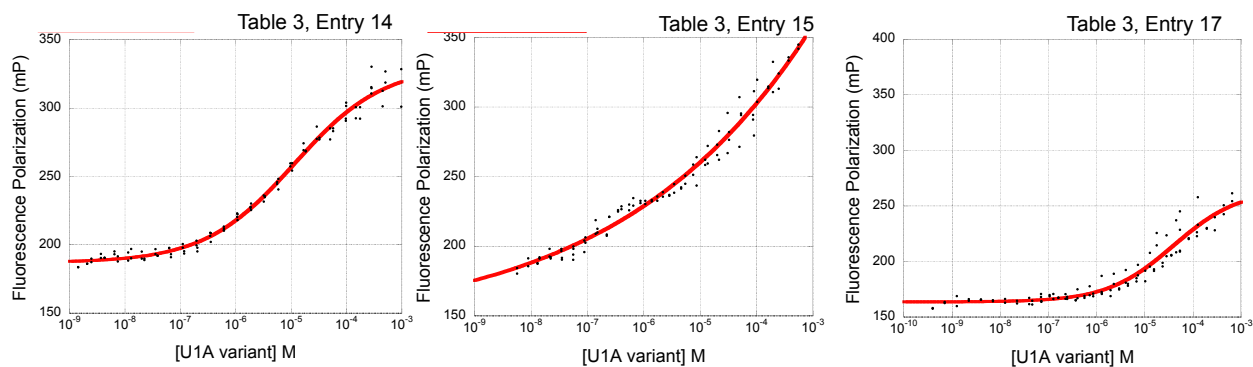

**Figure S4. Fluorescence Polarization Raw Data for Table 4. Binding selectivity of U1A-derived double mutants for TAR RNA over U1hplI RNA or TAR DNA.**

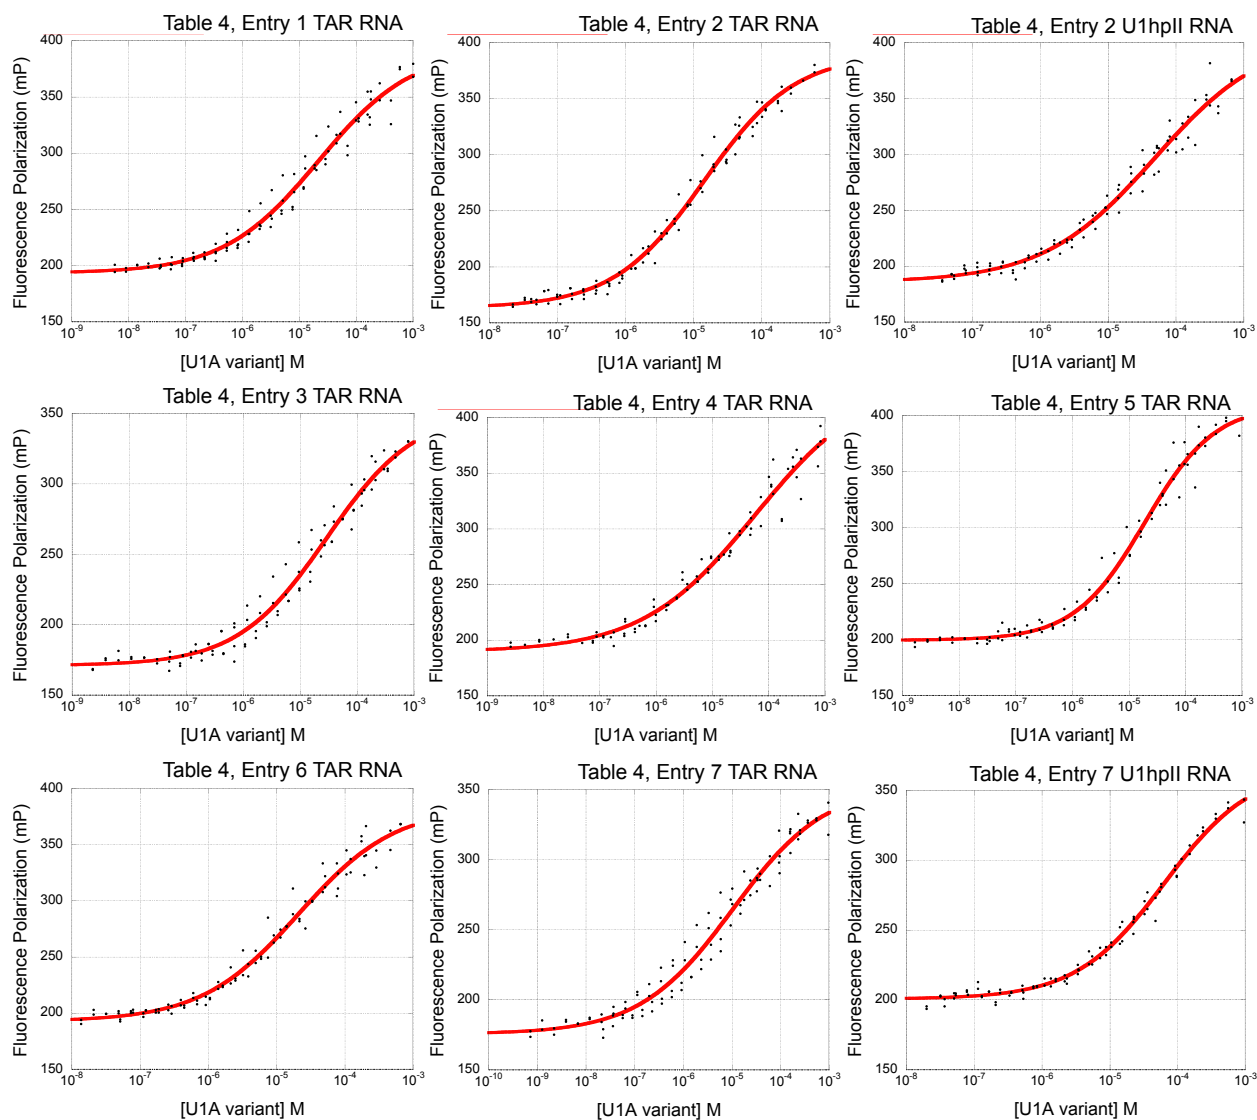

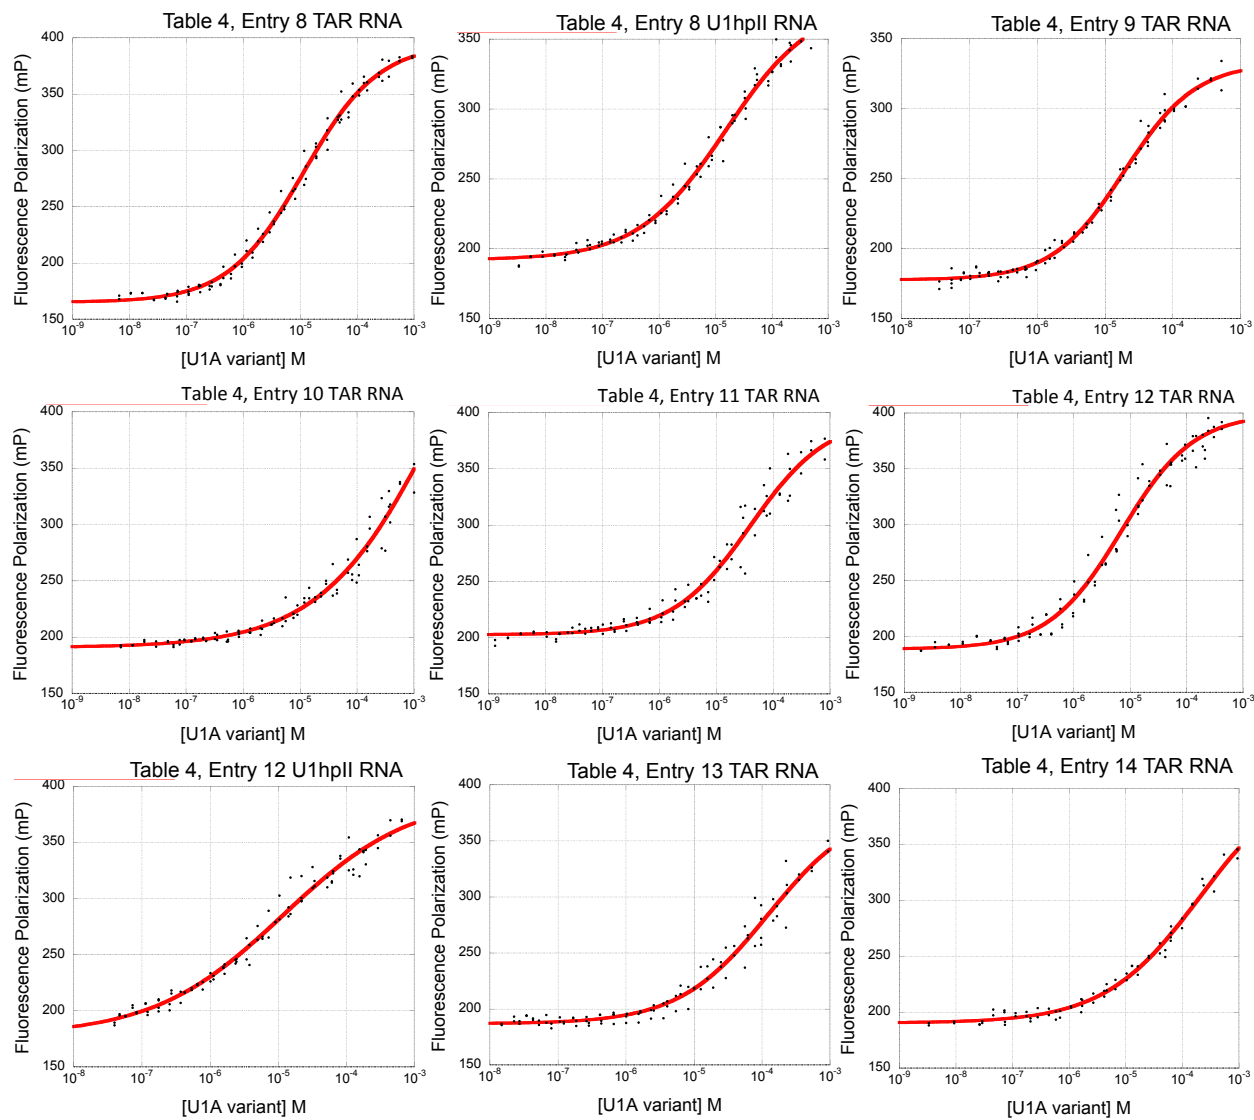

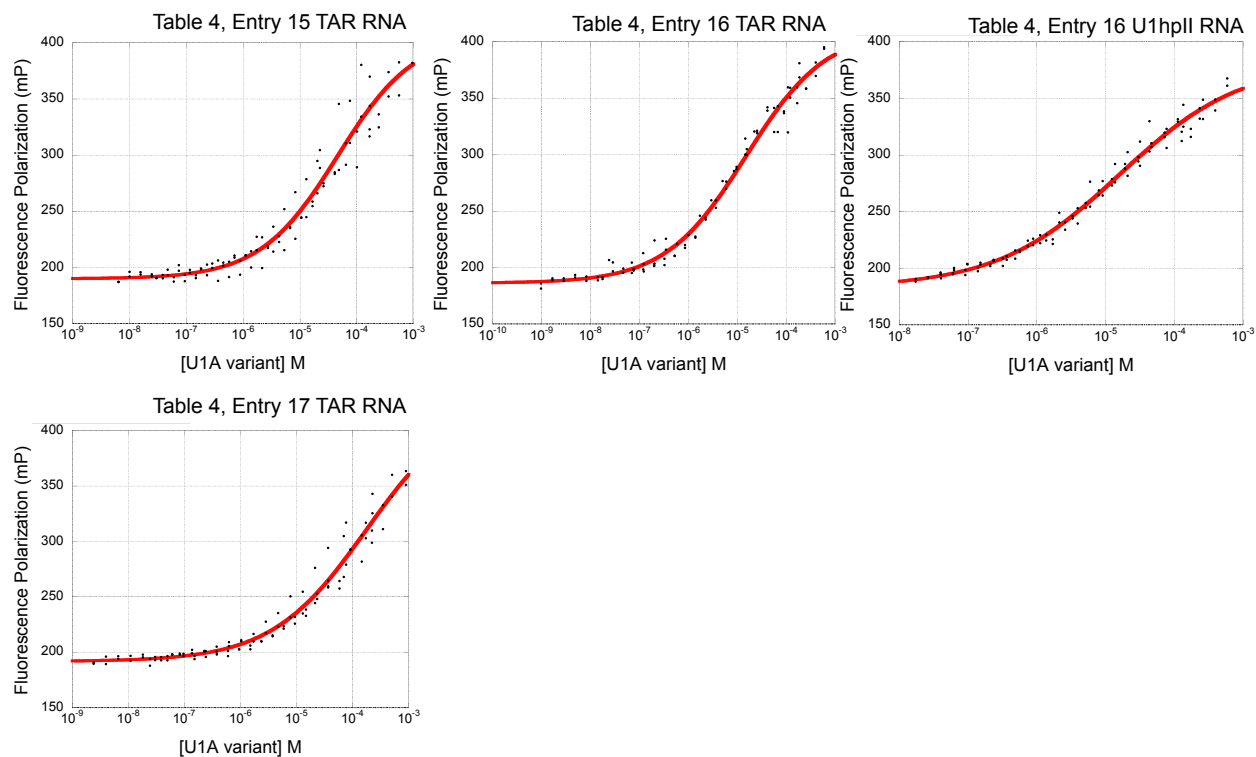

**Table S3. Selected Variants of U1A Binding to TAR RNA in the Presence or Absence of 10 Molar Equivalents of tRNA**

| Entry | RRM scaffold | Mutation | Off Mutation | TAR RNA $K_D$ ( $\mu\text{M}$ ) <sup>a</sup> | TAR RNA + tRNA $K_D$ ( $\mu\text{M}$ ) <sup>a</sup> | Fold-change in presence of tRNA <sup>b</sup> |
|-------|--------------|----------|--------------|----------------------------------------------|-----------------------------------------------------|----------------------------------------------|
| 1     | U1A          | Glu19Ser | ---          | 4.1 ( $\pm 0.3$ )                            | 6.4 ( $\pm 0.5$ )                                   | 1.6                                          |
| 2     | U1A          | Glu19Phe | ---          | 6.2 ( $\pm 0.8$ )                            | 19.9 ( $\pm 1.8$ )                                  | 3.2                                          |
| 3     | U1A          | Glu19Ser | Tyr13Gln     | 10.3 ( $\pm 1.4$ )                           | 10.2 ( $\pm 0.7$ )                                  | 1                                            |

<sup>a</sup>All double mutants are derived from native U1A. <sup>b,c</sup>The error for each reported dissociation constant ( $K_D$ ) is the standard deviation of three separate experiments. <sup>d</sup>Fold-change was calculated by ( $K_D$  for TAR RNA + 10 M eq tRNA /  $K_D$  TAR RNA).

**Figure S5. Fluorescence Polarization Raw Data for Table S3. Selected Variants of U1A in Complex with TAR RNA in the Presence of 10 Molar Equivalents of tRNA.**

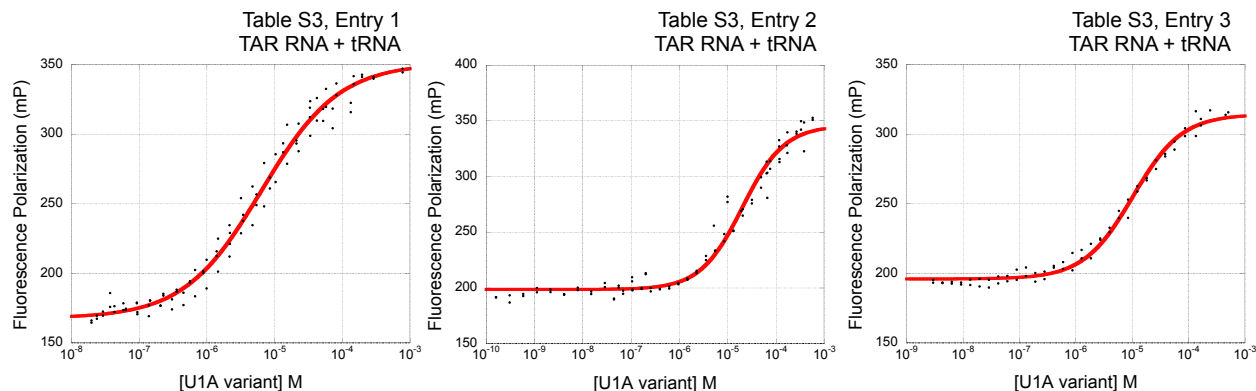

**Figure S6. Combinations of Beneficial Single Mutations into the U1A or  $\Delta$ K50 $\Delta$ M51 Scaffold and Tested for Affinity to TAR RNA by Fluorescence Polarization.**

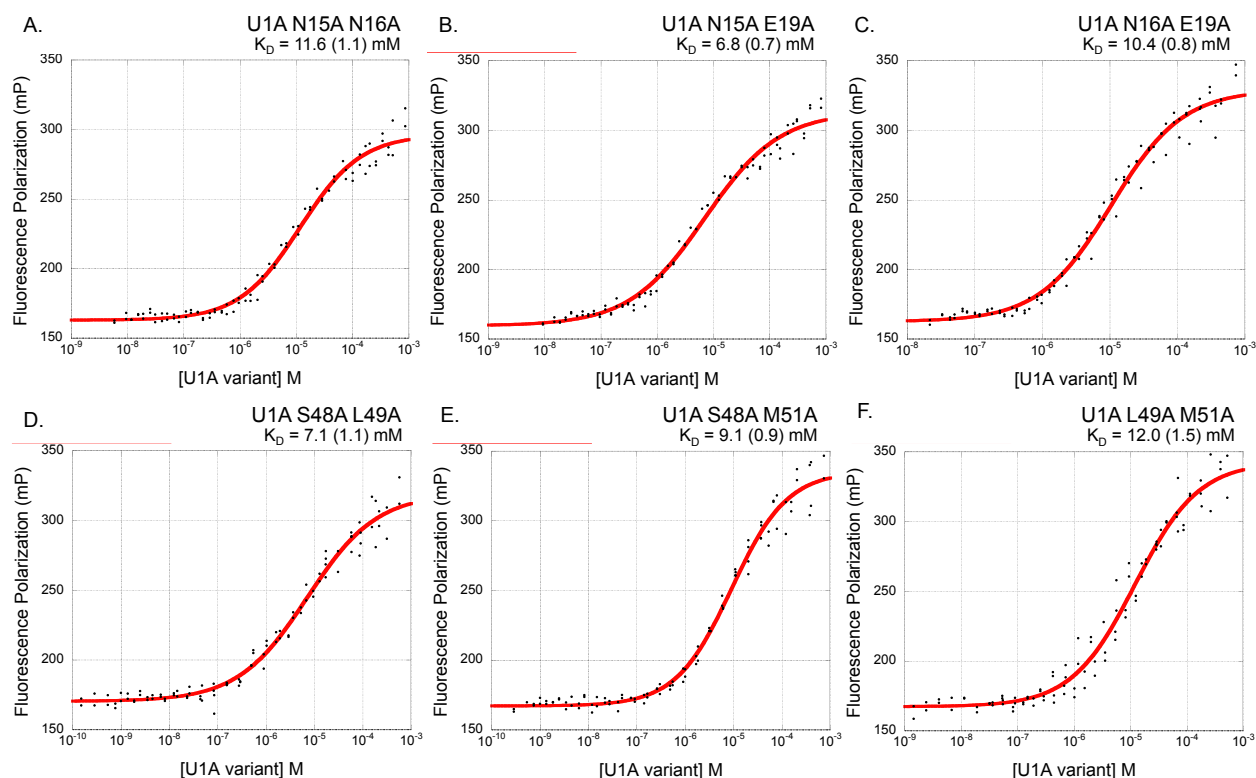

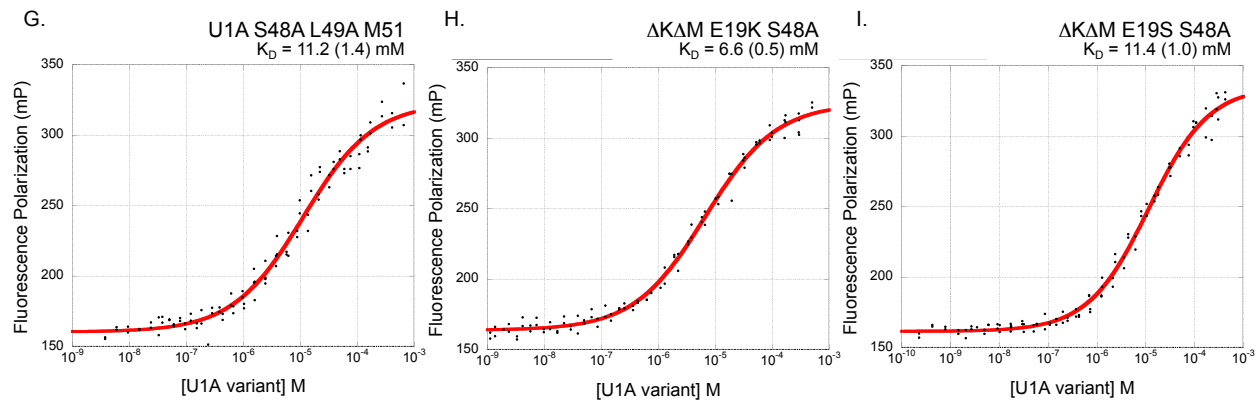

## Purity of Select Proteins Used in this Study as Analyzed by PAGE

Figure S7. Selected Variants of U1A Featured in Table S3

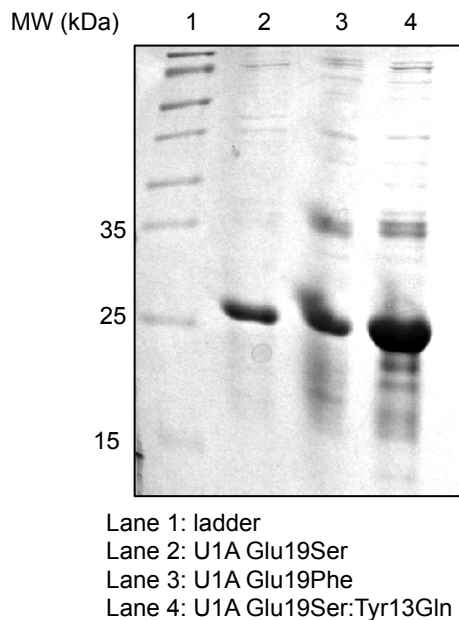

<sup>S1</sup> Blakeley, B.D.; Shattuck, J.; Coates, M.B.; Tran, E.; Laird-Offringa, I.A.; McNaughton, B.R. *Biochemistry* **2013**, *52*, 4745.
